# Supplementary material
Source: Springer Nature journal article supplement (https://www.springermedizin.de/resource/supplementary/13058_2012_3226_MOESM2_ESM.pdf/9703538)

A) TIMP-1 negative tumors

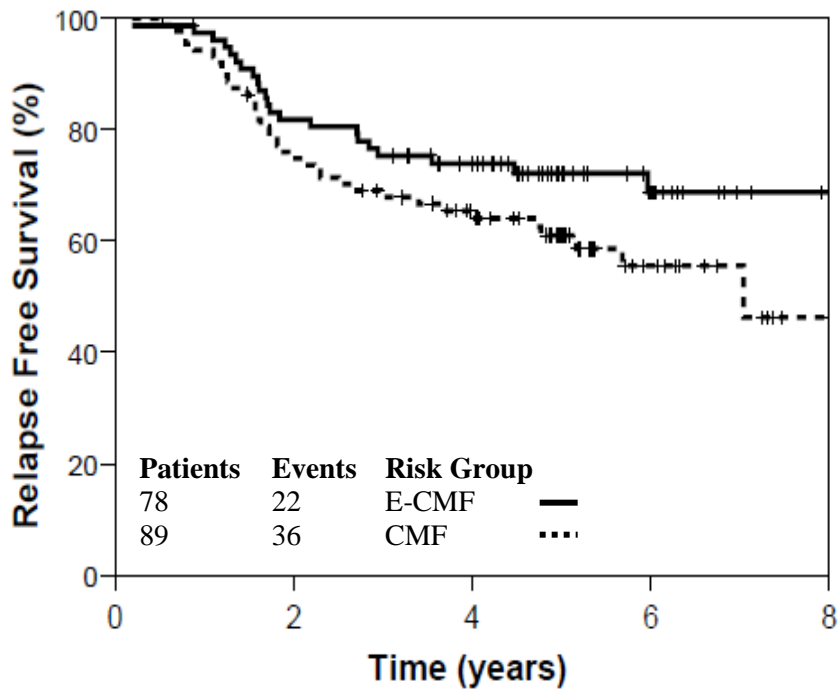

B) TIMP-1 immunoreactive tumors

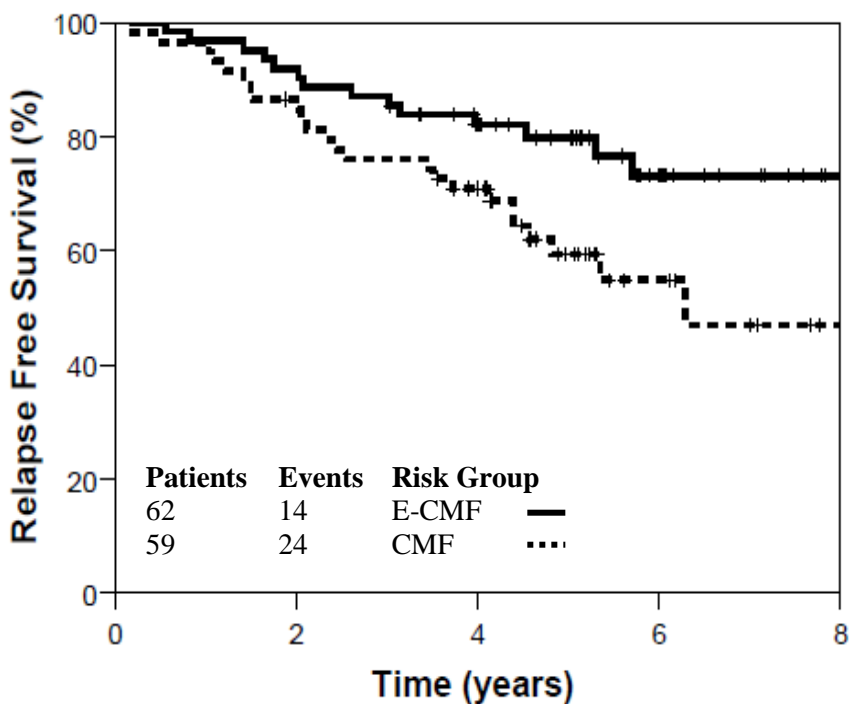

Supplement: MOESM2 [file 9703538]
